# Supplementary material
Source: Springer Nature journal article supplement (http://www.springermedizin.de/resource/supplementary/12891_2013_1838_MOESM1_ESM.pdf/9508590)

**A**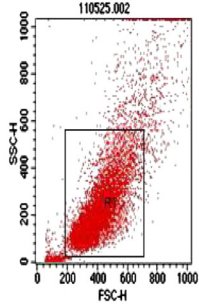**CD44**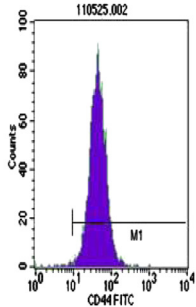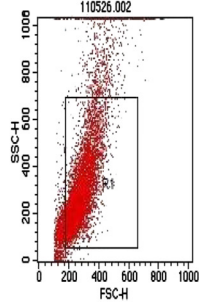**CD34**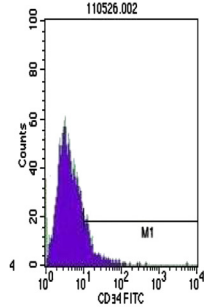**B**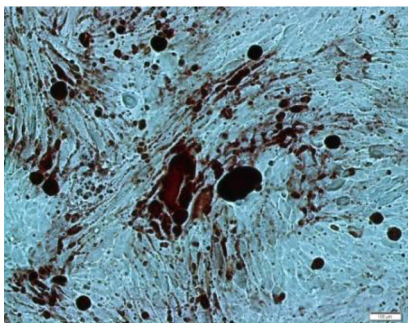**C**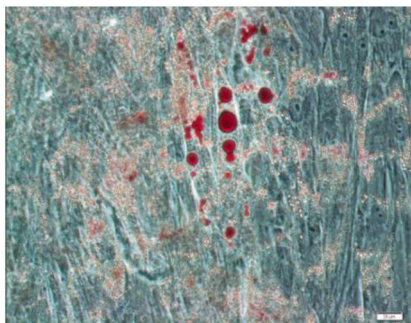

Supplement: MOESM1 [file 9508590]
